# Supplementary material
Source: PubMed Central journal article supplement (PMC8419012)
Supplement: NIHMS1697824-supplement-5.pdf [file NIHMS1697824-supplement-5.pdf]

# Supplemental Figure S5

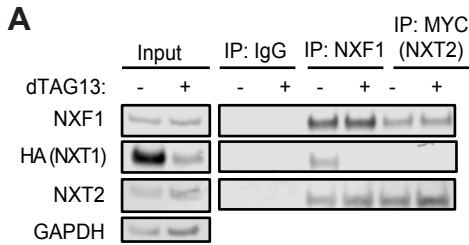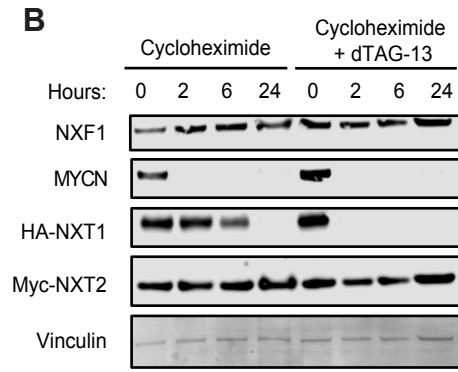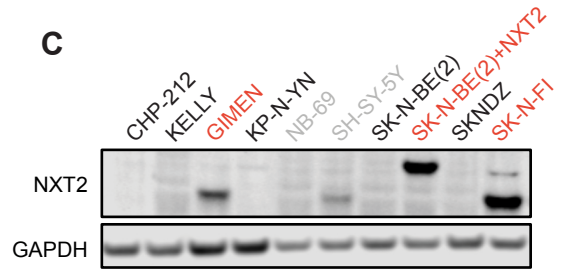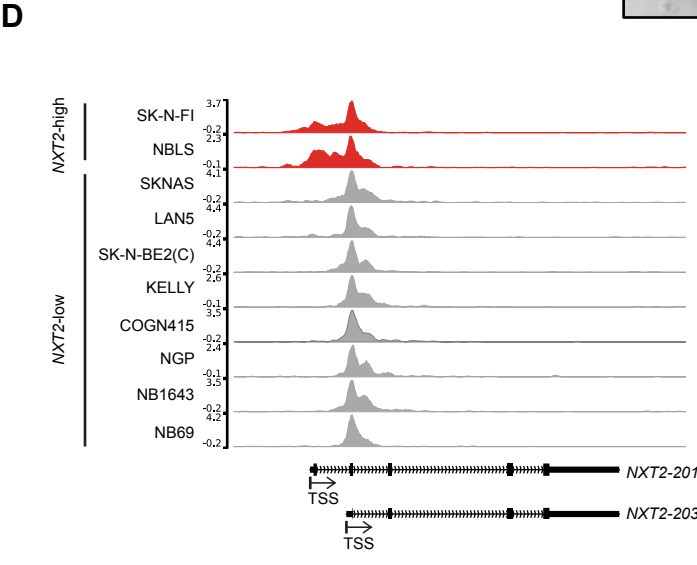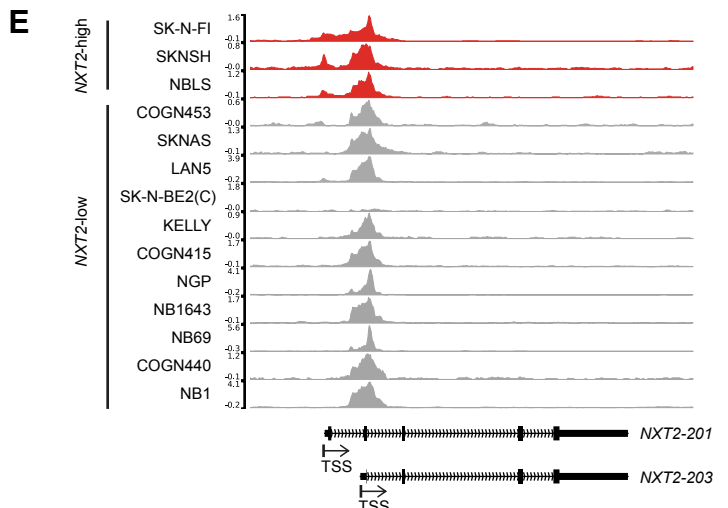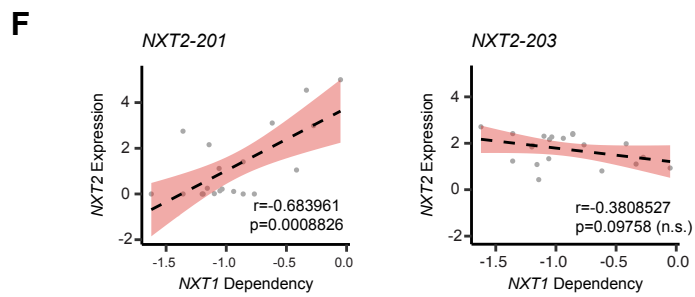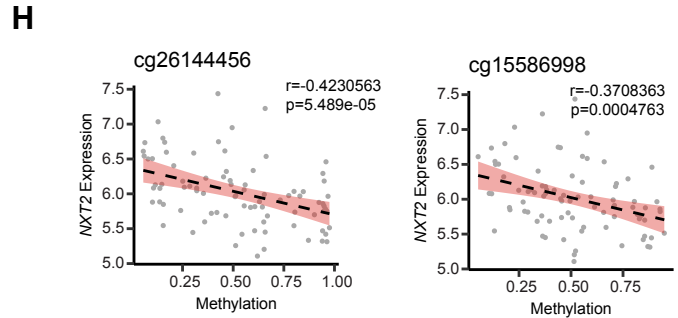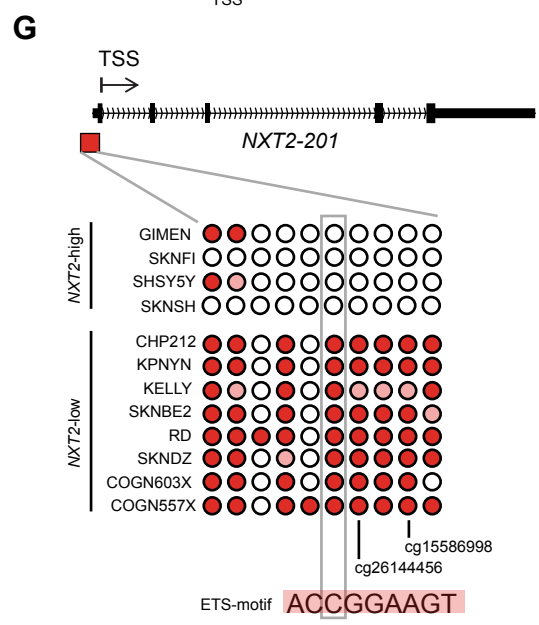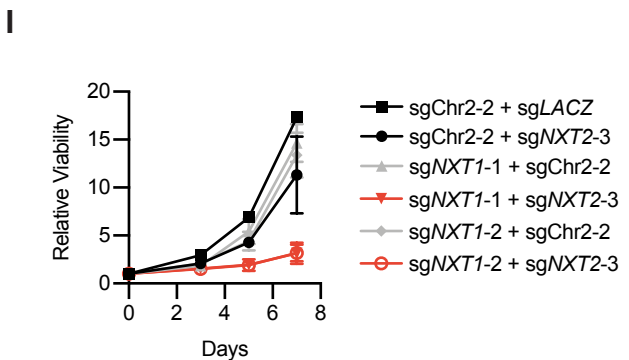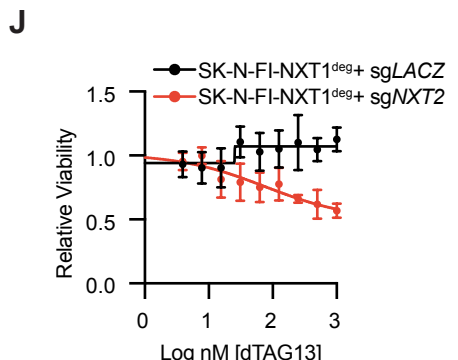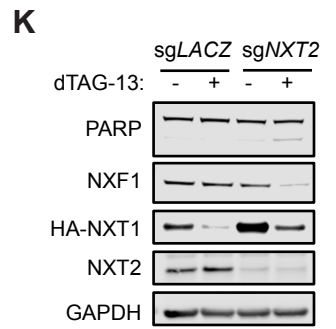

## Supplemental Figure S5. Differential *NXT2* expression in neuroblastoma cell lines

**A**, Immunoprecipitations were performed using antibodies targeting mouse IgG, NXF1 and MYC (*NXT2*) six hours after DMSO or 500 nM dTAG13 treatment, as indicated in the SK-N-BE(2)-*NXT1*<sup>deg</sup> cell line overexpressing *NXT2*. NXF1, *NXT2* and HA (*NXT1*) levels are shown. Input lysate is shown to the left with NXF1, *NXT2*, HA (*NXT1*), and GAPDH. **B**, KELLY-*NXT*<sup>deg</sup> cells overexpressing *NXT2* were treated with 50 µg/mL cycloheximide plus DMSO or 500 nM dTAG-13 as indicated. Cells were lysed at the indicated time after treatment, and the western blot depicts NXF1, MYCN, HA-*NXT1*, myc-*NXT2*, and vinculin levels. MYCN is a short half-life protein used as a control for cycloheximide treatment. **C**, Western blot of *NXT2* levels across a panel of neuroblastoma cell lines. In black are neuroblastoma lines that are dependent on *NXT1* in the DepMap dataset. In red are neuroblastoma cell lines that are not dependent on *NXT1* in DepMap or in low-throughput experiments. Gray cell lines have not been assessed for *NXT1* dependency. **D**, H3K4me3 ChIP seq tracks for *NXT2* in neuroblastoma cell lines. Cell lines are ordered based on *NXT2* expression, with SK-N-FI the highest and NB69 the lowest. Cell lines with high expression are colored in red, others are in grey. Two main isoforms of *NXT2* are shown below. **E**, ATAC-seq tracks for *NXT2* in neuroblastoma cell lines. Cell lines are ordered and colored by *NXT2* expression as in **D**. Two main isoforms of *NXT2* are shown below. **F**, Transcript level expression for two major isoforms of *NXT2* is shown. At left, the expression of the full-length *NXT2-201* isoform is shown on the y-axis, and *NXT1* dependency CERES score is shown on the x-axis for 19 neuroblastoma cell lines. The best fit line is shown as a dotted line, and the *p*-value and Pearson correlation coefficient are shown at bottom right. At right, the same data is depicted for the shorter *NXT2-203* isoform with an alternative start site that results in a different first exon. **G**, Bisulfite sequencing for a stretch of 10 CpGs upstream of the TSS for the full length *NXT2* (indicated by red box) described by Sung et al. (29) was performed for neuroblastoma cell lines with high or low *NXT2* expression. Each circle represents a CpG in that region: white circles are

unmethylated, red circles are methylated, and pink circles are partially methylated. A CpG that falls in a consensus ETS-family recognition sequence is indicated with a box. CpGs included in the Illumina 450k methylation array are labeled with their array ID. **H**, Correlation of DNA methylation with *NXT2* expression in neuroblastoma tumors in the TARGET dataset. The y-axis indicates the Affymetrix array expression of *NXT2*, and the x-axis indicates the methylation beta value for the indicated CpG in the Illumina 450K array, where 0 is unmethylated and 1 is fully methylated. The CpG array ID is shown at top, and corresponds with the CpGs labeled in **G**. The best fit line is shown with a dotted line, and Pearson correlation coefficient and *p*-values are shown at top right. **I**, GIMEN cells were stably transduced with sgRNAs targeting Chr2-2 (negative control) or *NXT1* as indicated. They were then transduced with sgRNAs targeting *LACZ* or *NXT2*. Cells with knockout of both *NXT1* and *NXT2* are shown in red. Viability relative to day 0 was assessed by CellTiter-Glo. Relative viability is graphed on the y-axis, and days are shown on the x-axis. Each data point represents the mean +/- stdev of replicates. **J**, Dose response curve for dTAG-13 after 48 hours in SK-N-FI-NXT1<sup>deg</sup> cells infected with sg*LACZ* (black) or sg*NXT2* (red). Viability (relative to DMSO) is shown on the y-axis, and the log of the nM concentration of dTAG-13 is shown on the x-axis. Data points indicate the mean +/- stdev of technical replicates. **K**, SK-N-FI-NXT1<sup>deg</sup> infected with sg*LACZ* or sg*NXT2*, were treated with 500 nM dTAG-13 for 24 hours and PARP, NXF1, HA-NXT1, *NXT2*, and GAPDH levels were assessed by western blot.
